# Supplementary material for: An inter-laboratory comparison of standard membrane-feeding assays for evaluation of malaria transmission-blocking vaccines
Source: Springer Nature journal article supplement (doi:10.1186/s12936-016-1515-z), 2016-09-09
Supplement: MOESM1 [file 12936_2016_1515_MOESM1_ESM.pdf]

## Additional file 1: IC<sub>50</sub> calculations for 85RF45.1 mAb

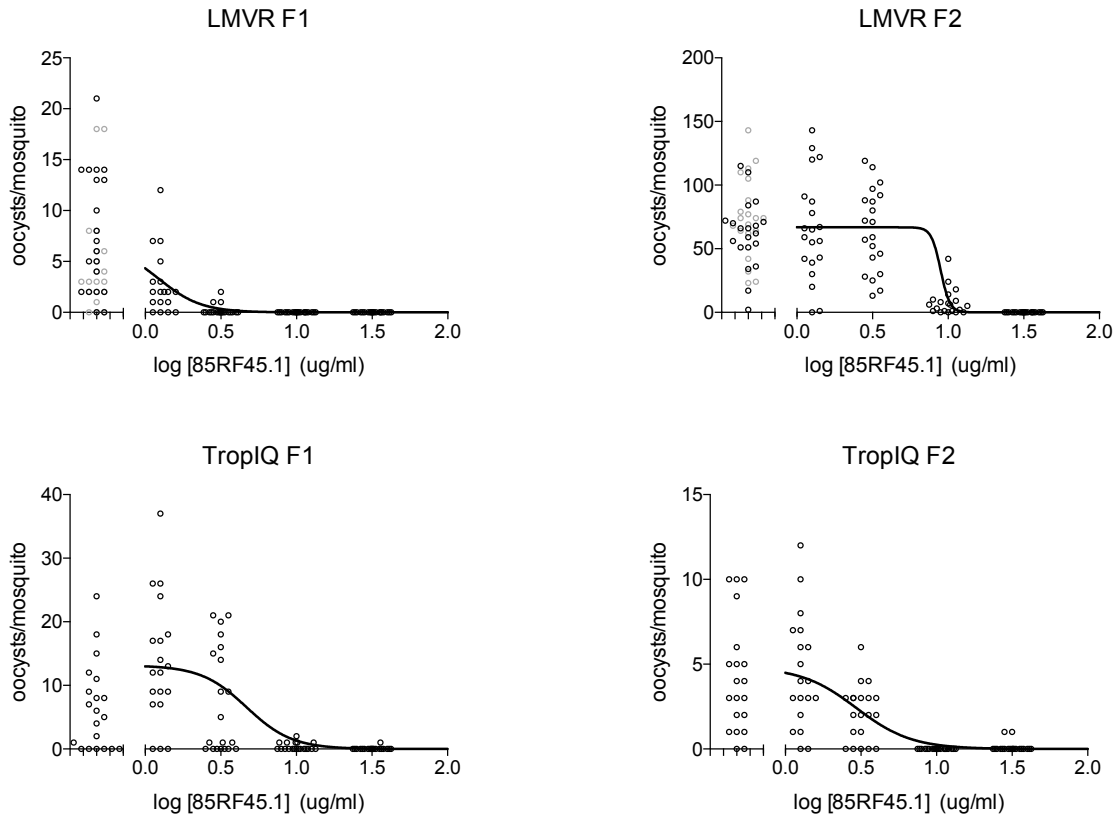

In both laboratories, rat 85RF45.1 mAb was tested at 1.2, 3.5, 10.4 and 31.3  $\mu\text{g/ml}$  in two feeding experiments (F1 and F2). Oocyst count in each mosquito and the best fit to a Hill equation are shown.
