# Supplementary material for: An inter-laboratory comparison of standard membrane-feeding assays for evaluation of malaria transmission-blocking vaccines
Source: Springer Nature journal article supplement (doi:10.1186/s12936-016-1515-z), 2016-09-09
Supplement: MOESM2 [file 10687874]

## Additional file 2: IC<sub>50</sub> calculations for positive human pAb

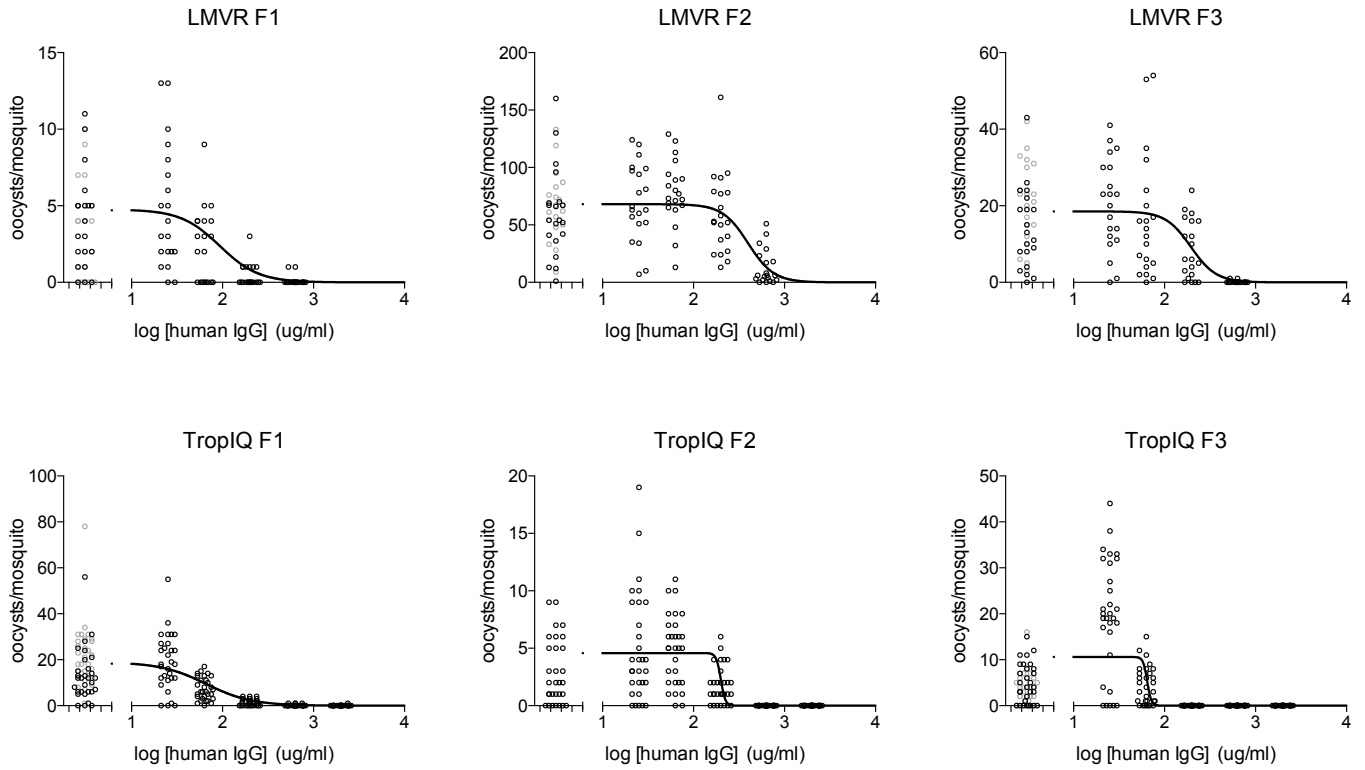

In both laboratories, positive human IgG was tested at 23, 70, 10.4, 210 and 630  $\mu\text{g/ml}$  in three feeding experiments (F1, F2 and F3). Oocyst count in each mosquito and the best fit to a Hill equation are shown.
